# Supplementary material for: Targeting vivax malaria in the Asia Pacific: The Asia Pacific Malaria Elimination Network Vivax Working Group
Source: PubMed Central journal article supplement (PMC4667409; doi:10.1186/s12936-015-0958-y), 2015-12-01
Supplement: 12936_2015_958_MOESM5_ESM.pdf [file 12936_2015_958_MOESM5_ESM.pdf]

**Supplementary Table 5:** APMEN Vivax Working Group Research grants in alphabetical order

|                           |                                                                                                                                                                                            |
|---------------------------|--------------------------------------------------------------------------------------------------------------------------------------------------------------------------------------------|
| Bhutan                    | Molecular assessment of <i>P. vivax</i> transmission dynamics in Bhutan                                                                                                                    |
| Bhutan                    | Malaria elimination in Bhutan using mobile technology for disease mapping and early diagnosis                                                                                              |
| Bhutan                    | Parasite clearance and recurrence rates among patients with vivax malaria on chloroquine and primaquine therapy                                                                            |
| Cambodia                  | Glucose-6-phosphate enzyme activity dynamics and G6PD qualitative test performance in G6PD deficient Cambodian patients undergoing weekly primaquine for acute uncomplicated vivax malaria |
| China                     | Improving the accuracy of <i>P. vivax</i> case reporting using molecular methods                                                                                                           |
| China                     | Population screening for G6PD deficiency in China using an enzyme assay on filter paper dried bloodspots                                                                                   |
| China                     | Sero-epidemiological analysis for monitoring malaria elimination in China                                                                                                                  |
| China                     | Target malaria elimination intervention in China using spatial-temporal distribution analysis                                                                                              |
| Indonesia                 | Genetic diversity of <i>P. vivax</i> in Indonesia                                                                                                                                          |
| Indonesia                 | Survey of G6PD variants on Sumba Island and development of PCR primers for each                                                                                                            |
| Indonesia                 | Prevalence of G6PD deficient individuals in Bangka Island                                                                                                                                  |
| Indonesia                 | Spatial analysis of the incidence of G6PD mutations in <i>Plasmodium vivax</i> infection in South Central Timor (SCT), East Nusa Tenggara (ENT) Province, Indonesia, 2013                  |
| Indonesia                 | Community survey on knowledge, attitude and practise of malaria intervention (diagnosis & treatment) for vivax malaria in Indonesia                                                        |
| Malaysia                  | Molecular genotyping of <i>P. vivax</i> in isolates in Sabah, Malaysia                                                                                                                     |
| Malaysia                  | Artesunate-mefloquine vs. chloroquine in patients with acute uncomplicated <i>P. vivax</i> : a randomized open label trial in Sabah, Malaysia                                              |
| Philippines               | A prevalence study of glucose-6-phosphate dehydrogenase deficiency and operational issues in applying the test in resource poor areas in the Philippines                                   |
| Republic of Korea         | Evaluation of sensitivity and specificity of RDTs using microscopy and PCR in vivax malaria detection                                                                                      |
| Sri Lanka                 | Dynamics of <i>Plasmodium vivax</i> parasite populations during malaria elimination efforts in Sri Lanka, with low transmission and unstable malaria                                       |
| Sri Lanka                 | Assessing the prevalence of malaria parasites in displaced populations who have returned or resettled in the post conflict districts of Kilinochichi, Mullaithivu and Mannar in Sri Lanka  |
| Vanuatu & Solomon Islands | Evaluation of safety and efficacy of two primaquine dosing regimens for the radical treatment of <i>Plasmodium vivax</i> malaria in Vanuatu and Solomon Islands                            |
